# Supplementary material for: Superalkali nature of the Si9M5 (M = Li, Na, and K) Zintl clusters: a theoretical study on electronic structure and dynamic nonlinear optical properties
Source: Royal Society of Chemistry journal article supplement (doi:10.1039/d4ra02396j), 2024-01-01
Supplement: d4ra02396j1.pdf [file d4ra02396j1.pdf]

## Supporting Information for:

### Superalkali Nature of the $\text{Si}_9\text{M}_5$ (M=Li, Na, K) Zintl Clusters: A Theoretical Study on Electronic Structure and Dynamic Nonlinear Optical Properties

Atazaz Ahsin,<sup>ae</sup> Aamna Qamar,<sup>be</sup> S. Muthu,<sup>c</sup> V. Vetrivelan,<sup>d</sup> Jianwei Cao,<sup>\*a</sup> and

Wensheng Bian<sup>\*ae</sup>

<sup>a</sup> Beijing National Laboratory for Molecular Sciences, Institute of Chemistry, Chinese Academy of Sciences, Beijing 100190, China

<sup>b</sup> Beijing National Laboratory for Molecular Sciences, State Key Laboratory of Polymer Physics and Chemistry, Chinese Academy of Sciences, Beijing 100190, China.

<sup>c</sup> Department of Physics Arignar Anna Govt. Arts Colleg Cheyyar, 604407, Tamil Nadu, India

<sup>d</sup> Department of Physics Government College of Engineering, Srirangam, Thiruchirappalli, 620012, Tamilnadu, India

<sup>e</sup> School of Chemical Sciences, University of Chinese Academy of Sciences, Beijing 100049, China.

E-mail: caojw@iccas.ac.cn; bian@iccas.ac.cn

## Contents

|           |     |
|-----------|-----|
| Figure S1 | S3  |
| Figure S2 | S3  |
| Figure S3 | S4  |
| Figure S4 | S4  |
| Figure S5 | S5  |
| Figure S6 | S5  |
| Figure S7 | S6  |
| Figure S8 | S6  |
| Table S1  | S7  |
| Table S2  | S8  |
| Table S3  | S9  |
| Table S4  | S9  |
| Table S5  | S10 |

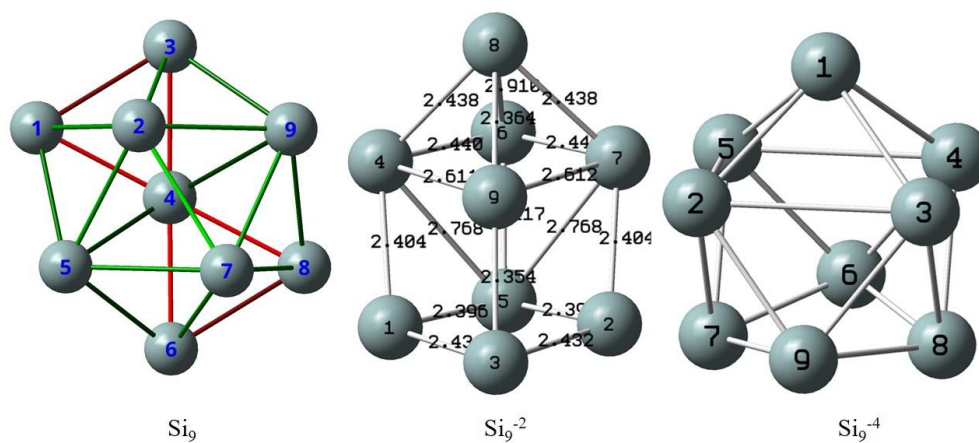

**Figure S1.** The optimized geometries of the  $\text{Si}_9$  clusters at the  $\omega\text{B97xd/def2-qzvp}$  level.

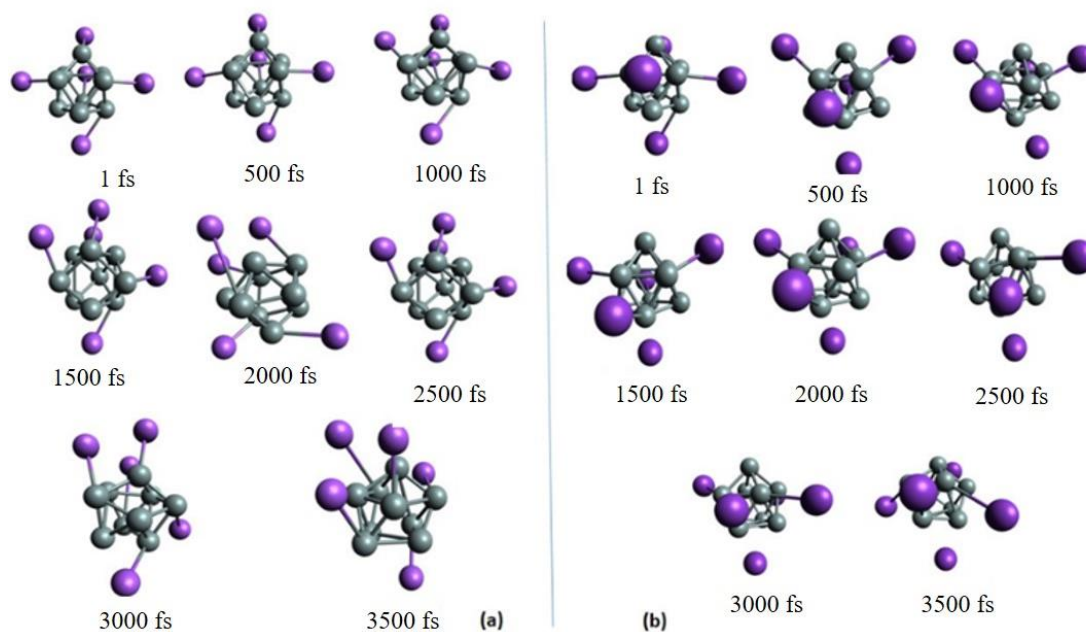

**Figure S2.** Snapshot of geometries at every 500 fs for (a)  $\text{Si}_9\text{Na}_5$  and (b)  $\text{Si}_9\text{K}_5$  during AIMD simulation at the  $\text{B3LYP-D3/def2-SVP}$  level.

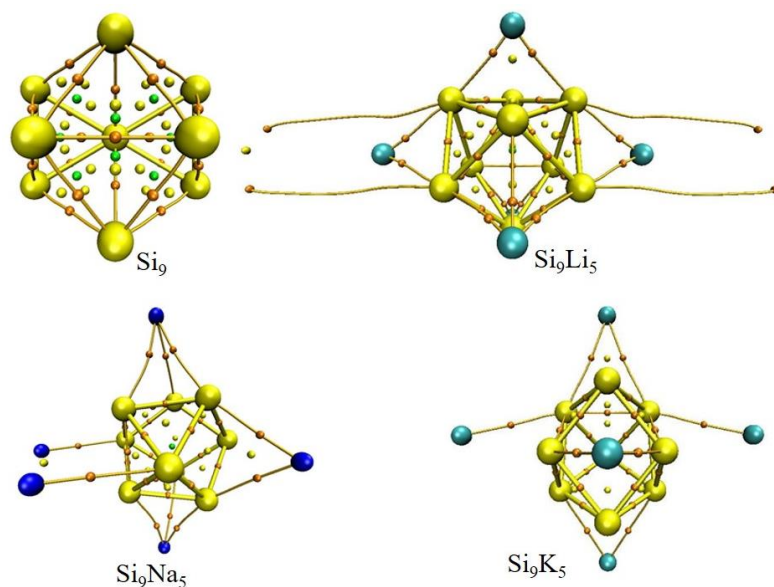

**Figure S3.** Quantum theory of atoms in molecules (QTAIM) analysis of the present clusters at the  $\omega b97Xd/def2-qzvp$  level.

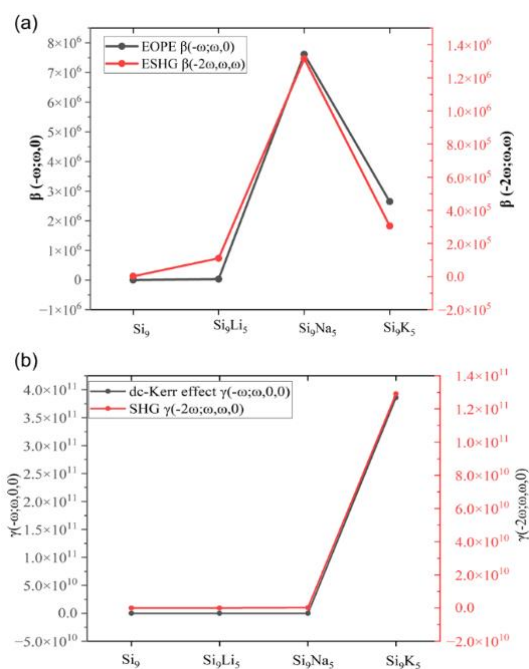

**Figure S4.** Frequency-dependent NLO response: (a) Plotted electro-optical-Pockel's effect EOPE  $\beta(-\omega, \omega, 0)$  and ESHG  $\beta(-2\omega, \omega, \omega)$  at the external frequency of 532 nm (b) dc-Kerr effect  $\gamma(-\omega, \omega, 0, 0)$  and second harmonic generation constant SHG  $\gamma(-2\omega, \omega, \omega, 0)$  at 1900 nm.

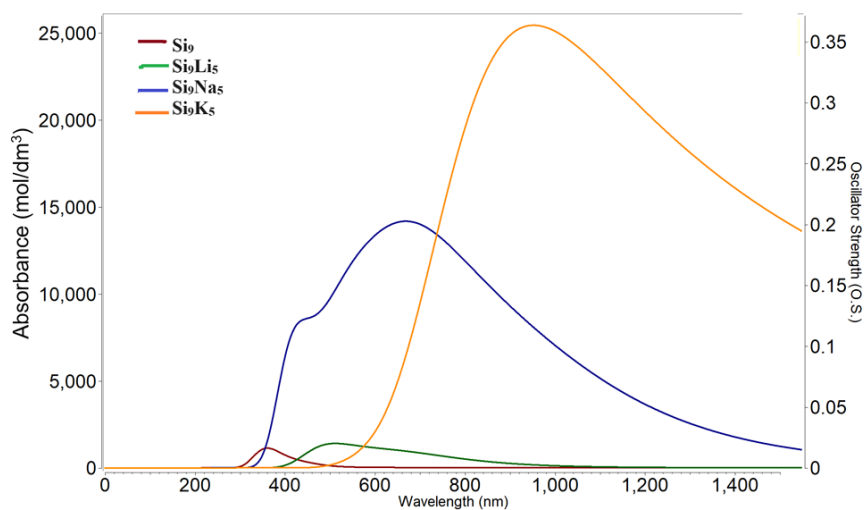

**Figure S5.** Absorption spectra of designed clusters at the  $\omega b97xd/def2-qzvp$  level

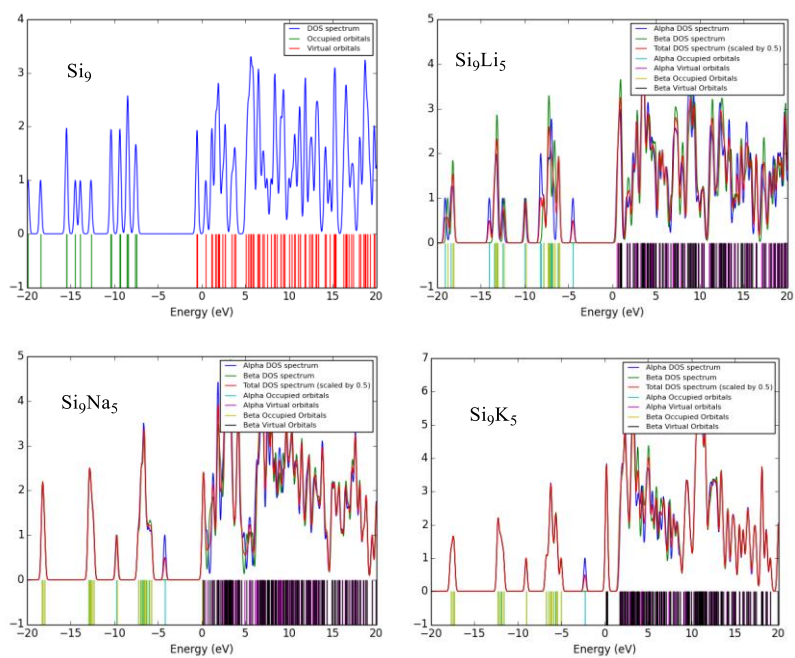

**Figure S6.** The total density of states (TDOS) spectra of  $Si_9$  and  $Si_9M_5$  at the  $\omega b97xd/def2-qzvp$  level.

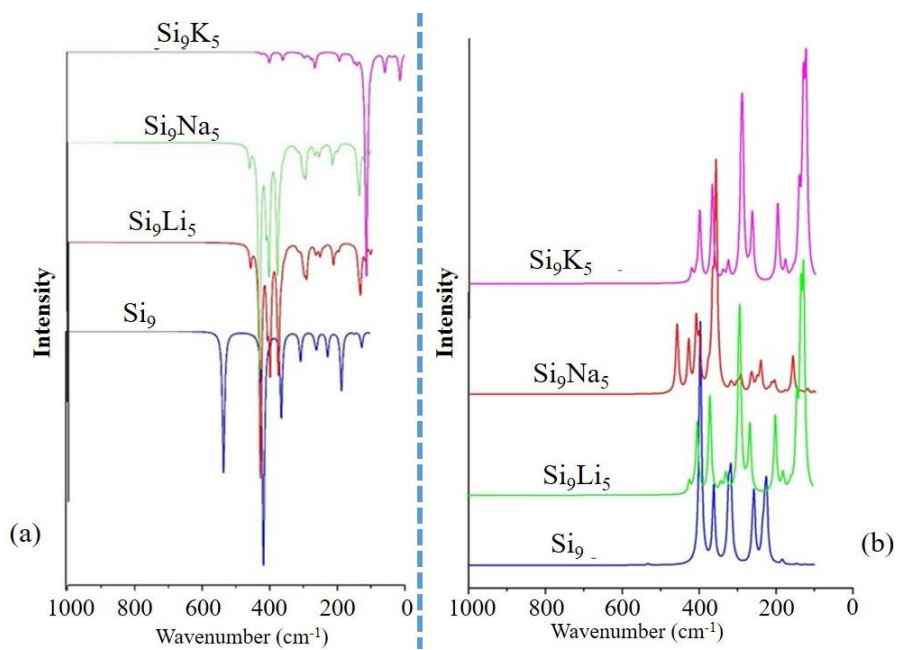

**Figure S7.** (a) FT-IR and (b) Raman spectrum of designed clusters at the  $\omega b97xd/def2-qzvp$  level.

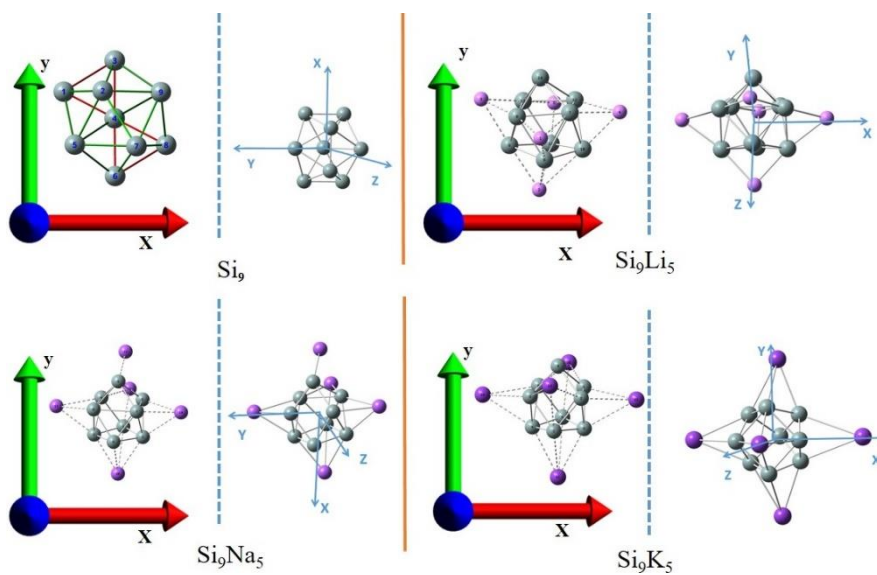

**Figure S8.** The optimized structures of the present clusters, in which the X-Y planes (with  $Z=0$ ) are used to plot the electron localization function and 2D Localized orbital locator spectra for the present clusters.

**Table S1.** Optimized cartesian coordinates at the uwb97xd/ def2qzvp level.

| <b>Si<sub>9</sub></b>               |             |             |             | <b>Si<sub>9</sub>Li<sub>5</sub></b> |             |             |             |
|-------------------------------------|-------------|-------------|-------------|-------------------------------------|-------------|-------------|-------------|
| Si                                  | 2.04068700  | 1.18521600  | -0.75198800 | Li                                  | 3.71009300  | -0.06767500 | -0.26046500 |
| Si                                  | 1.29839400  | 0.00011300  | 1.34546700  | Li                                  | 0.00025200  | -1.73800000 | 2.73252700  |
| Si                                  | 2.04071400  | -1.18445800 | -0.75310000 | Li                                  | 0.00004000  | 3.12415600  | 0.88833800  |
| Si                                  | -0.00004500 | -0.00014500 | -0.83051900 | Li                                  | -0.00016700 | -2.42502600 | -2.64597900 |
| Si                                  | -0.00083100 | 2.02685000  | 0.57446900  | Li                                  | -3.71010100 | -0.06780700 | -0.25999700 |
| Si                                  | -2.04066300 | 1.18445100  | -0.75305200 | Si                                  | 1.69170800  | -0.88144800 | 1.04612400  |
| Si                                  | -1.29829100 | 0.00003600  | 1.34557100  | Si                                  | 1.26426100  | -0.46704100 | -1.41633000 |
| Si                                  | -2.04085500 | -1.18525800 | -0.75167000 | Si                                  | 1.66859900  | 1.37702400  | 0.18716600  |
| Si                                  | 0.00089000  | -2.02680400 | 0.57482200  | Si                                  | 0.00015900  | 0.72477000  | 1.95280600  |
|                                     |             |             |             | Si                                  | 0.00003400  | -2.15898800 | -0.09902300 |
|                                     |             |             |             | Si                                  | -1.69148900 | -0.88148700 | 1.04640900  |
|                                     |             |             |             | Si                                  | -1.26453800 | -0.46705400 | -1.41624300 |
|                                     |             |             |             | Si                                  | -1.66860000 | 1.37697900  | 0.18744700  |
|                                     |             |             |             | Si                                  | -0.00015900 | 1.62889200  | -1.58573200 |
|                                     |             |             |             |                                     |             |             |             |
| <b>Si<sub>9</sub>Na<sub>5</sub></b> |             |             |             | <b>Si<sub>9</sub>K<sub>5</sub></b>  |             |             |             |
| Si                                  | 0.03916200  | -0.00000900 | 1.96296400  | Si                                  | -1.77026400 | -0.00673800 | 1.27968100  |
| Si                                  | 1.27410000  | -1.64307900 | 0.62704100  | Si                                  | -1.44138100 | 1.27253800  | -0.76195800 |
| Si                                  | 1.27419300  | 1.64300100  | 0.62704900  | Si                                  | -1.42879100 | -1.28620700 | -0.76007100 |
| Si                                  | -1.09134500 | 1.30964000  | 0.24152300  | Si                                  | -0.06494800 | -1.77119200 | 1.18300700  |
| Si                                  | -1.09142100 | -1.30957600 | 0.24151700  | Si                                  | -0.08156700 | 1.77353800  | 1.18000200  |
| Si                                  | -1.33132900 | 0.00004200  | -1.80819300 | Si                                  | 1.63804000  | 0.00932300  | 1.20155900  |
| Si                                  | 0.66616300  | -1.34334200 | -1.72083700 | Si                                  | 1.25063800  | 1.25187500  | -0.81833100 |
| Si                                  | 0.66624000  | 1.34330500  | -1.72082800 | Si                                  | 1.26145200  | -1.24013100 | -0.81644600 |
| Si                                  | 2.45665000  | -0.00007300 | -0.82474100 | Si                                  | -0.14146300 | -0.00148600 | -2.38425200 |
| Na                                  | 3.17411700  | -0.00008200 | 2.09046100  | K                                   | 4.71704100  | 0.01489600  | -0.59864200 |
| Na                                  | -2.86647700 | 0.00010000  | 2.60083700  | K                                   | 0.05771700  | 0.00404500  | 4.00575300  |
| Na                                  | 0.02332200  | 3.97652200  | -0.60688900 | K                                   | 0.10126200  | 4.18125700  | -1.12666300 |
| Na                                  | -3.99710000 | 0.00009400  | -0.45544500 | K                                   | -4.44319000 | -0.02074400 | -0.64503600 |
| Na                                  | 0.02306700  | -3.97651900 | -0.60686800 | K                                   | 0.14064100  | -4.18057400 | -1.12197300 |

**Table S2.** Calculated bond lengths of the Si<sub>9</sub> and Si<sub>9</sub>M<sub>5</sub> (M=Li, Na, K) clusters.

|                                 | Si-Si bonds                     | Distance (Å) | Si-M                 | Distance (Å) |
|---------------------------------|---------------------------------|--------------|----------------------|--------------|
| Si <sub>9</sub>                 | 9-8=1-5=9-3=5-6                 | 2.73         | -                    | -            |
|                                 | 4-8=4-6=4-1=4-3                 | 2.52         | -                    | -            |
|                                 | 9-7=9-2=2-5=7-5=                | 2.76         | -                    | -            |
|                                 | 6-8=1-3                         | 2.60         | -                    | -            |
|                                 | 2-7=2.82                        | 2.71         | -                    | -            |
| Si <sub>9</sub> Li <sub>5</sub> | Si-Si(capped position (14,9,10) |              | Li(1,2,3,4,5)-Si     |              |
|                                 | 14-12=14-13=14-8=14-7           | 2.60         | 7-4, 12-4, 10-4=     | 2.77         |
|                                 | 9-8=9-13=9-11=9-6               | 2.65         | 8-3=13-3=9-3         | 2.68         |
|                                 | 10-7=10-12                      | 2.68,        | 9-2=6-2=11-2=10-2    | 2.92         |
|                                 | 10-6=10-11                      | 2.54         |                      |              |
|                                 | 7-8=13-12                       | 2.70         |                      |              |
| Si <sub>9</sub> Na <sub>5</sub> | Si-Si (capped position 2,3,6)   |              | Na(14,12,13,10)-Si   |              |
|                                 | 2-7=2-5=2-9=2-1                 | 2.46         | 14-5=14-2=14-7       | 3.02         |
|                                 | 3-8=2.49, 3-4=                  | 2.46         | 12-8=12-4=12-3       | 3.02         |
|                                 | 3-9=3-1=2.47                    | 2.47         | 10-3=10-2=2.91,      | 3.21         |
|                                 | 6-4=6-5=2.47, 6-8=6-7           | 2.42         | 10-1=10-9            | 3.22         |
|                                 |                                 |              | 11-4=11-6=11-5       | 3.01         |
| Si <sub>9</sub> K <sub>5</sub>  | Si-Si (capped position 5,4,9)   |              | K(10,11,12,13,14)-Si |              |
|                                 | 2-7=2-5=2-9=2-1                 | 2.46         | 14-3=14-8=14-4       | 3.41         |
|                                 | 3-8=2.49,                       | 2.47         | 10-7=10-8            | 3.67         |
|                                 | 3-4=2.46, 3-9=3-1               | 2.47         | 10-9=10-6            | 3.78         |
|                                 | 6-4=6-5=2.47, 6-8=6-7           | 2.42         | 12-2=12-7=12-5       | 3.42         |
|                                 |                                 |              | 13-2=12-3=2.85,13-1  | 3.65         |
|                                 |                                 |              | 11-4=11-5            | 2.92,        |
|                                 |                                 |              | 11-6=11-6            | 3.66         |



**Table S3.** NBO analysis based upon Fock matrix.

| Cluster                         | Donor(i) | Type       | Acceptor(j) | Type       | $E_{(2)}$ <sup>a</sup><br>(kcal/mol) | $E(i)-E(j)$ <sup>b</sup><br>(au) | $F(i,j)$ <sup>c</sup><br>(au) |
|---------------------------------|----------|------------|-------------|------------|--------------------------------------|----------------------------------|-------------------------------|
| Si <sub>9</sub>                 | Si3-Si4  | $\sigma$   | Si4-Si9     | $\sigma$   | 46.39                                | 0.09                             | 0.166                         |
|                                 | Si4-Si5  | $\sigma$   | Si4-Si6     | $\sigma$   | 69.71                                | 0.31                             | 0.315                         |
|                                 | Si4-Si6  | $\sigma$   | Si4-Si9     | $\sigma$   | 80.41                                | 0.02                             | 0.091                         |
|                                 | Si4-Si6  | $\sigma$   | Si4-Si5     | $\sigma^*$ | 29.82                                | 0.29                             | 0.212                         |
|                                 | Si4-Si8  | $\sigma$   | Si4-Si6     | $\sigma^*$ | 26.95                                | 0.45                             | 0.262                         |
|                                 | Si4-Si8  | $\sigma$   | Si3-Si4     | $\sigma^*$ | 28.07                                | 0.31                             | 0.213                         |
|                                 | Si4-Si9  | $\sigma$   | Si4-Si8     | $\sigma$   | 72.96                                | 0.29                             | 0.309                         |
|                                 | Si4-Si5  | $\sigma^*$ | Si4-Si8     | $\sigma^*$ | 28.39                                | 0.02                             | 0.007                         |
| Si <sub>9</sub> Li <sub>5</sub> | Si6-Si9  | $\sigma^*$ | Si8-Si9     | $\sigma^*$ | 43.15                                | 0.03                             | 0.269                         |
|                                 | Si6-Si9  | $\sigma^*$ | Si9-Si13    | $\sigma^*$ | 36.30                                | 0.03                             | 0.245                         |
|                                 | Si9-Si11 | $\sigma^*$ | Si8-Si9     | $\sigma^*$ | 36.75                                | 0.03                             | 0.245                         |
|                                 | Si9-Si11 | $\sigma^*$ | Si9-Si13    | $\sigma^*$ | 44.86                                | 0.03                             | 0.269                         |
| Si <sub>9</sub> Na <sub>5</sub> | Si9-Si11 | $\sigma^*$ | Si8-Si9     | $\sigma^*$ | 36.75                                | 0.03                             | 0.245                         |
|                                 | Si9-Si11 | $\sigma^*$ | Si9-Si13    | $\sigma^*$ | 44.86                                | 0.03                             | 0.269                         |
|                                 | Si1-Si2  | $\sigma$   | Si5         | LP* (2)    | 27.34                                | 0.21                             | 0.218                         |
|                                 | Si3-Si4  | $\sigma$   | Si1-Si2     | $\pi^*$    | 18.20                                | 0.06                             | 0.086                         |
|                                 | Si4-Si5  | $\sigma$   | Si1-Si2     | $\pi^*$    | 21.57                                | 0.24                             | 0.192                         |
|                                 | Si7-Si9  | $\pi$      | Si1-Si2     | $\pi^*$    | 45.66                                | 0.07                             | 0.159                         |
| Si <sub>9</sub> K <sub>5</sub>  | Si4-Si8  | $\sigma^*$ | Si3-Si8     | $\sigma^*$ | 50.04                                | 0.04                             | 0.315                         |
|                                 | Si3-Si8  | $\sigma$   | Si4-Si8     | $\sigma^*$ | 8.54                                 | 0.62                             | 0.230                         |
|                                 | Si3-Si8  | $\sigma$   | Si3-Si8     | $\sigma^*$ | 4.73                                 | 0.66                             | 0.176                         |

<sup>a</sup>  $E_{(2)}$  means energy of hyper conjugative interactions. <sup>b</sup> Energy difference between donor and acceptor i and j NBO orbitals. <sup>c</sup>  $F(i,j)$  is the Fock matrix element between i and j NBO orbitals.

**Table S4.** Polarizability ( $\alpha_o$ ), and hyperpolarizability ( $\beta_o$ ) parameters (in au) with different solvents using the  $\omega$ b97xd/def2-qzvp method

|                                 | Acetone           |                   | Ethanol           |                   | Methanol          |                   | water             |                   |
|---------------------------------|-------------------|-------------------|-------------------|-------------------|-------------------|-------------------|-------------------|-------------------|
|                                 | $\alpha_o$        | $\beta_o$         | $\alpha_o$        | $\beta_o$         | $\alpha_o$        | $\beta_o$         | $\alpha_o$        | $\beta_o$         |
| Si <sub>9</sub>                 | $4.9 \times 10^2$ | $2.4 \times 10^2$ | $4.9 \times 10^2$ | $2.4 \times 10^2$ | $5.0 \times 10^2$ | $2.3 \times 10^2$ | $5.1 \times 10^2$ | $2.1 \times 10^2$ |
| Si <sub>9</sub> Li <sub>5</sub> | $7.8 \times 10^2$ | $2.5 \times 10^3$ | $7.9 \times 10^2$ | $2.5 \times 10^3$ | $8.0 \times 10^2$ | $2.5 \times 10^3$ | $8.3 \times 10^2$ | $2.6 \times 10^2$ |
| Si <sub>9</sub> Na <sub>5</sub> | $1.0 \times 10^3$ | $8.2 \times 10^4$ | $1.0 \times 10^2$ | $7.8 \times 10^4$ | $1.0 \times 10^3$ | $7.3 \times 10^4$ | $2.6 \times 10^3$ | $6.1 \times 10^4$ |
| Si <sub>9</sub> K <sub>5</sub>  | $2.4 \times 10^3$ | $2.9 \times 10^6$ | $2.5 \times 10^3$ | $8.1 \times 10^6$ | $2.7 \times 10^3$ | $3.9 \times 10^6$ | $3.0 \times 10^2$ | $5.5 \times 10^6$ |

**Table S5.** The calculated FT-IR and Raman spectrum values at the ob97xd/def2-qzvp level.

| Si <sub>5</sub>                 |              |                | Si <sub>6</sub> Li <sub>3</sub> |              |                | Si <sub>6</sub> Na <sub>3</sub> |              |                | Si <sub>6</sub> K <sub>3</sub>  |              |                | Assignments <sup>[a]</sup>                                           |
|---------------------------------|--------------|----------------|---------------------------------|--------------|----------------|---------------------------------|--------------|----------------|---------------------------------|--------------|----------------|----------------------------------------------------------------------|
| Wave number (cm <sup>-1</sup> ) | IR Intensity | Raman activity | Wave number (cm <sup>-1</sup> ) | IR intensity | Raman activity | Wave number (cm <sup>-1</sup> ) | IR intensity | Raman activity | Wave number (cm <sup>-1</sup> ) | IR intensity | Raman activity |                                                                      |
| 533                             | 10           | 0.5            |                                 |              |                |                                 |              |                |                                 |              |                | $\gamma$ Si-Si (50)+ $\tau$ Si-Si-Si-Si(12)                          |
|                                 |              |                | 460                             | 23.6         | 115.6          |                                 |              |                |                                 |              |                | $\gamma$ Si-Li (48)                                                  |
|                                 |              |                | 431                             | 205          | 2.61           |                                 |              |                |                                 |              |                | $\gamma$ Si-Li (38)                                                  |
|                                 |              |                | 430                             | 65.7         | 82.2           |                                 |              |                |                                 |              |                | $\gamma$ Si-Li (40)                                                  |
|                                 |              |                |                                 |              |                |                                 |              |                | 423                             | 5.4          | 83.0           | $\gamma$ Si-Si (41)+ $\beta$ SiSiSi(12)+ $\tau$ K-Si-Si-Si(12)       |
|                                 |              |                |                                 |              |                | 421                             | 2.8          | 34.5           |                                 |              |                | $\gamma$ Si-Si (41)+ $\beta$ SiSiSi(12)                              |
| 415                             | 17           | 0              |                                 |              |                |                                 |              |                |                                 |              |                | $\gamma$ Si-Si (49)+ $\beta$ SiSiSi(17)                              |
|                                 |              |                | 410                             | 74.2         | 113.9          |                                 |              |                | 410                             | 3.3          | 72.6           | $\gamma$ Si-Li/K (22)+ $\beta$ Li/KSiSi(10)                          |
|                                 |              |                | 402                             | 131.8        | 75.9           |                                 |              |                |                                 |              |                | $\gamma$ Si-Si (37)                                                  |
|                                 |              |                |                                 |              |                | 401                             | 1.9          | 201.8          |                                 |              |                | $\gamma$ Si-Si (46)                                                  |
|                                 |              |                |                                 |              |                |                                 |              |                | 400                             | 5.3          | 226.0          | $\gamma$ Si-Si (52)                                                  |
| 397                             | 17.9         | 106.5          |                                 |              |                |                                 |              |                |                                 |              |                | $\gamma$ Si-Si (50)+ $\tau$ Si-Si-Si-Si(10)                          |
|                                 |              |                | 379                             | 53.3         | 23.8           |                                 |              |                |                                 |              |                | $\gamma$ Si-Li (13)+ $\beta$ LiSiSi(13)                              |
|                                 |              |                | 377                             | 103.5        | 4.3            |                                 |              |                |                                 |              |                | $\gamma$ Si-Li (25)+ $\gamma$ Si-Si (12)                             |
|                                 |              |                |                                 |              |                | 368                             | 6.4          | 262.6          |                                 |              |                | $\gamma$ Si-Si (34)                                                  |
|                                 |              |                | 367                             | 16.4         | 141.6          |                                 |              |                |                                 |              |                | $\gamma$ Si-Si (27)+ $\tau$ Si-Si-Si-Si(13)                          |
| 362                             | 4.5          | 28.3           |                                 |              |                |                                 |              |                |                                 |              |                | $\gamma$ Si-Si (28)+ $\beta$ SiSiSi(12)                              |
|                                 |              |                |                                 |              |                |                                 |              |                | 361                             | 4.5          | 784.7          | $\gamma$ Si-Si (16)+ $\tau$ Si-Si-Si-Si(43)                          |
|                                 |              |                | 359                             | 5.9          | 369.5          |                                 |              |                |                                 |              |                | $\gamma$ Si-Si (27)+ $\tau$ Si-Si-Si-Si(12)                          |
|                                 |              |                |                                 |              |                | 326                             | 7.1          | 54.3           |                                 |              |                | $\gamma$ Si-Si (16)+ $\gamma$ Si-Na (12) + $\tau$ Si-Si-Si-Si(24)    |
| 323                             | 0            | 28.12          |                                 |              |                |                                 |              |                |                                 |              |                | $\gamma$ Si-Si (28)+ $\beta$ SiSiSi(31)                              |
| 317                             | 0            | 34.9           |                                 |              |                |                                 |              |                |                                 |              |                | $\gamma$ Si-Si (27)+ $\beta$ SiSiSi(14) + $\tau$ Si-Si-Si-Si(12)     |
|                                 |              |                |                                 |              |                |                                 |              |                | 309                             | 1.0          | 50.4           | $\gamma$ Si-Si (32)+ $\beta$ SiSiSi(12) + $\tau$ K-Si-Si-Si(11)      |
|                                 |              |                |                                 |              |                |                                 |              |                | 295                             | 7.4          | 295.3          | $\beta$ KSiSi(42) + $\tau$ K-Si-Si-K(19)                             |
|                                 |              |                |                                 |              |                | 293                             | 4.5          | 218.7          |                                 |              |                | $\beta$ SiSiSi(24) + $\tau$ Si-Si-Si-Si(12)                          |
|                                 |              |                |                                 |              |                | 290                             | 6.1          | 402.8          |                                 |              |                | $\beta$ SiSiSi(50) + $\tau$ Si-Si-Si-Si(12)                          |
|                                 |              |                |                                 |              |                |                                 |              |                | 286                             | 6.5          | 221.8          | $\beta$ KSiSi(24) + $\tau$ Si-Si-Si-Si(27)                           |
|                                 |              |                |                                 |              |                |                                 |              |                | 277                             | 14.4         | 289.1          | $\beta$ SiSiSi(38) + $\tau$ Si-Si-Si-Si(13)                          |
|                                 |              |                |                                 |              |                | 275                             | 13.9         | 2.8            |                                 |              |                | $\beta$ SiSiSi(22) + $\tau$ Si-Si-Si-Si(16)                          |
|                                 |              |                |                                 |              |                |                                 |              |                | 266                             | 4.0          | 4.0            | $\beta$ SiSiSi(18) + $\tau$ Si-Si-Si-Si(35)                          |
|                                 |              |                |                                 |              |                | 264                             | 0            | 189.1          |                                 |              |                | $\beta$ SiSiSi(15) + $\tau$ Si-Si-Si-Si(10)                          |
|                                 |              |                |                                 |              |                |                                 |              |                | 260                             | 6.0          | 188.7          | $\gamma$ Si-Si (11)+ $\beta$ SiSiSi(18) + $\tau$ Si-Si-Si-Si(24)     |
| 257                             | 1.2          | 28.6           |                                 |              |                |                                 |              |                |                                 |              |                | $\gamma$ Si-Si (27)+ $\beta$ SiSiSi(12) + $\tau$ Si-Si-Si-Si(12)     |
|                                 |              |                | 242                             | 2.8          | 51.9           |                                 |              |                |                                 |              |                | $\beta$ SiSiSi(11) + $\tau$ Si-Si-Si-Si(10)                          |
| 224                             | 1.9          | 29.1           |                                 |              |                |                                 |              |                |                                 |              |                | $\beta$ SiSiSi(47)                                                   |
|                                 |              |                |                                 |              |                | 198                             | 42.2         | 218.7          |                                 |              |                | $\gamma$ Si-Na (31)                                                  |
|                                 |              |                |                                 |              |                | 197                             | 80.1         | 4.0            |                                 |              |                | $\gamma$ Si-Na (52)                                                  |
| 183                             | 4.6          | 2.1            |                                 |              |                |                                 |              |                |                                 |              |                | $\gamma$ Si-Si (31)+ $\beta$ SiSiSi(13) + $\tau$ Si-Si-Si-Si(11)     |
|                                 |              |                |                                 |              |                | 163                             | 33.5         | 6.5            |                                 |              |                | $\beta$ SiSiSi(11)                                                   |
|                                 |              |                | 159                             | 0.6          | 63.9           |                                 |              |                |                                 |              |                | $\beta$ SiSiSi(10)                                                   |
|                                 |              |                |                                 |              |                | 157                             | 20.5         | 15.7           |                                 |              |                | $\gamma$ Si-Na (53)                                                  |
|                                 |              |                |                                 |              |                | 142                             | 35.5         | 223.9          |                                 |              |                | $\beta$ NaSiSi(16) + $\tau$ Si-Si-Si-Si(33)                          |
|                                 |              |                | 134                             | 51.5         | 134.2          |                                 |              |                |                                 |              |                | $\beta$ LiSiSi(15) + $\tau$ Li-Si-Si-Si(14) + $\tau$ Li-Si-Li-Si(14) |
|                                 |              |                |                                 |              |                | 131                             | 0.4          | 471.0          |                                 |              |                | $\gamma$ Si-Na (49)                                                  |
|                                 |              |                |                                 |              |                | 124                             | 5.6          | 542.2          |                                 |              |                | $\gamma$ Si-Na (18)                                                  |
|                                 |              |                |                                 |              |                |                                 |              |                | 112                             | 607          | 8.7            | $\tau$ K-Si-K-Si(19)                                                 |

[a]  $\gamma$  is stretching,  $\beta$  is bending, and  $\tau$  is torsion.
